# Supplementary material for: Locoregional Recurrence Following Breast Cancer Surgery in the Trastuzumab Era: A Systematic Review by Subtype
Source: Springer Nature journal article supplement (doi:10.1245/s10434-017-6021-1), 2017-07-28
Supplement: MOESM1 [file 13336362]

Supplemental table 1: Intrinsic breast cancer subtypes

| Intrinsic subtype | Hormone receptor status | HER2/neu receptor status |
| --- | --- | --- |
| Luminal A | ER/PR positive | Her2 negative |
| Luminal B | ER/PR positive | HER2 positive |
| HER2/neu over-expressing | ER/PR negative | HER2 positive |
| Triple negative | ER/PR negative | HER2 negative |
